# Supplementary material
Source: PubMed Central journal article supplement (PMC7269790)
Supplement: ajcr0010-1467-f5.pdf [file ajcr0010-1467-f5.pdf]

## Celecoxib prevent hand-foot syndrome

**Table S1.** Dosage after sorafenib interruption or reduction

| Patient numbers of dose reduction/interruption |                                     | Dosage after dose interruption or reduction |           |              |
|------------------------------------------------|-------------------------------------|---------------------------------------------|-----------|--------------|
|                                                |                                     | normal                                      | reduction | interruption |
| Sorafenib group (n = 27)                       | Dose interruption subgroup (n = 12) | 2                                           | 8         | 2            |
|                                                | Dose reduction subgroup (n = 15)    | 6                                           | 9         |              |
| SoraCele group (n = 9)                         | Dose interruption subgroup (n = 3)  | 1                                           | 1         | 1            |
|                                                | Dose reduction subgroup (n = 6)     | 3                                           | 3         |              |
